# Supplementary material for: Liquid-crystal-imprinted synthesis of chiral polypyrroles without a chiral centre using a two-step method of spark-discharge oligomerisation-electrochemical polymerisation
Source: Royal Society of Chemistry journal article supplement (doi:10.1039/d4nr03982c), 2025-01-01
Supplement: d4nr03982c1.pdf [file d4nr03982c1.pdf]

Supplementary Information

## Liquid-crystal-imprinted synthesis for chiral polypyrrole without a chiral centre using a double-step method of spark-discharge oligomerisation–electrochemical polymerisation

Ryo Miyashita,<sup>a</sup> Aoi Tokutake,<sup>a</sup> Shigeki Nimori<sup>b</sup> and Hiromasa Goto\*<sup>a</sup>

<sup>a</sup>Department of Materials Science, Institute of Pure and Applied Sciences, University of Tsukuba, Tsukuba, Ibaraki 305-8573, Japan.

<sup>b</sup>National Institute for Materials Science (NIMS), Tsukuba Magnet Laboratory, Sakura, Tsukuba 3-13, Japan

Email: [gotoh@ims.tsukuba.ac.jp](mailto:gotoh@ims.tsukuba.ac.jp)

**Table S1.** Molecular weights of pyrrole oligomers irradiated with spark discharge.

|           | Irradiation time of spark discharge |       |        |
|-----------|-------------------------------------|-------|--------|
|           | 1 min                               | 3 min | 10 min |
| $M_n$     | 298                                 | 483   | 543    |
| $M_w$     | 332                                 | 530   | 558    |
| $M_w/M_n$ | 1.12                                | 1.10  | 1.03   |

$M_n$ : the number- average molecular weight.  $M_w$ : the weight-average molecular weight.  $M_w/M_n$ : the molecular weight distribution.

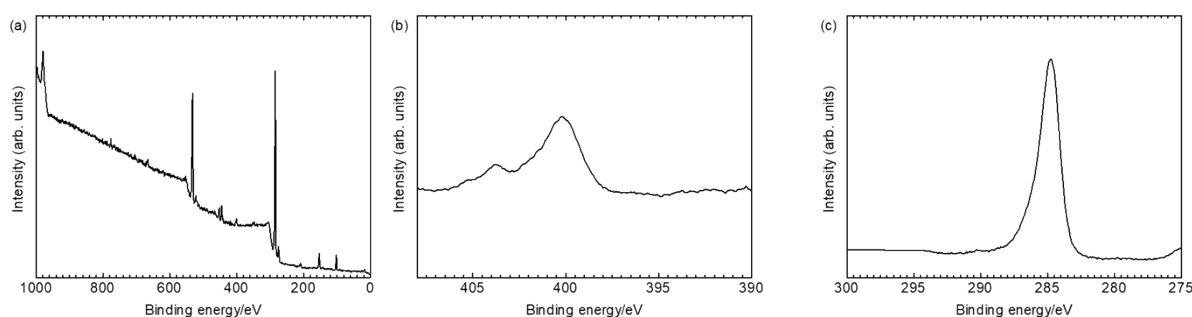

**Figure. S1.** X-ray photoelectron spectroscopy result of PPy/TWO-STEP. (a) Full scale in the range of 1000–0 eV, selected scales in the range of (b) 408–390 eV corresponding to the signal of N atom, and (c) 300–275 eV corresponding to the signal of C atom.

**Table S2.** Atomic concentration of elements in PPy/TWO-STEP.

|                          | C <sub>1s</sub> | N <sub>1s</sub> |
|--------------------------|-----------------|-----------------|
| Atomic concentration (%) | 79.6            | 20.4            |

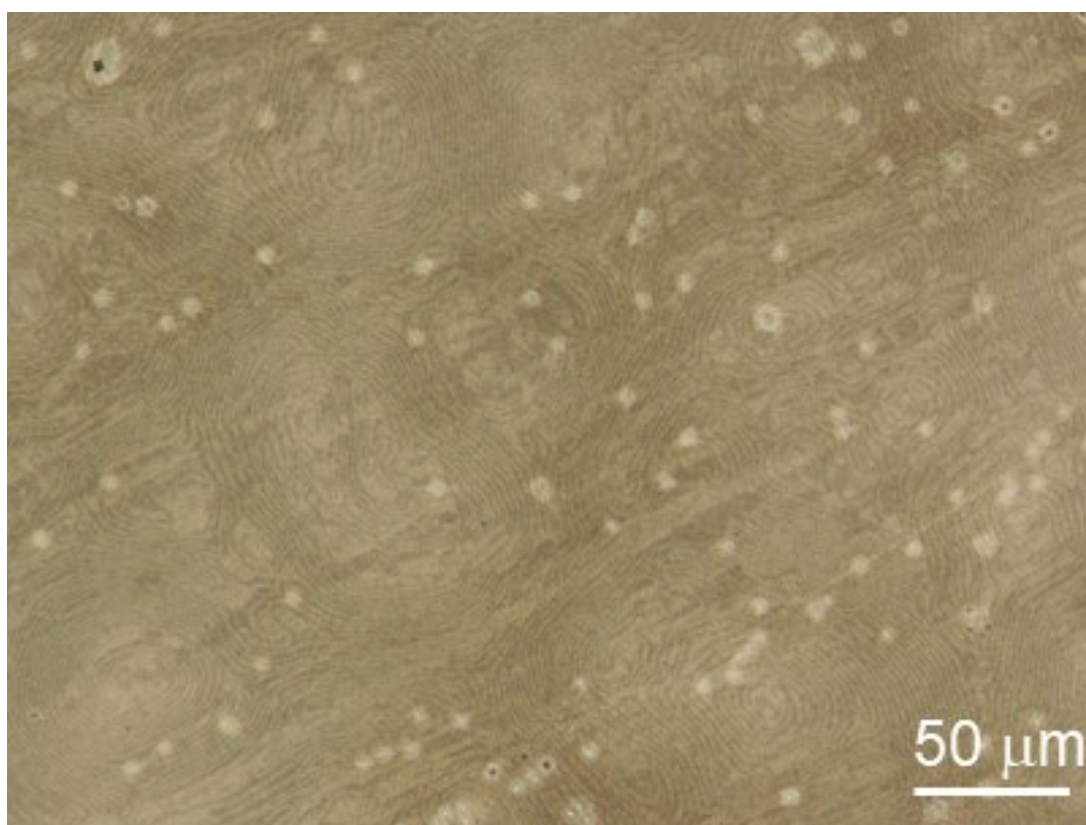

**Figure. S2.** Polarising optical microscopy (POM) image of PPy/TWO-STEP.

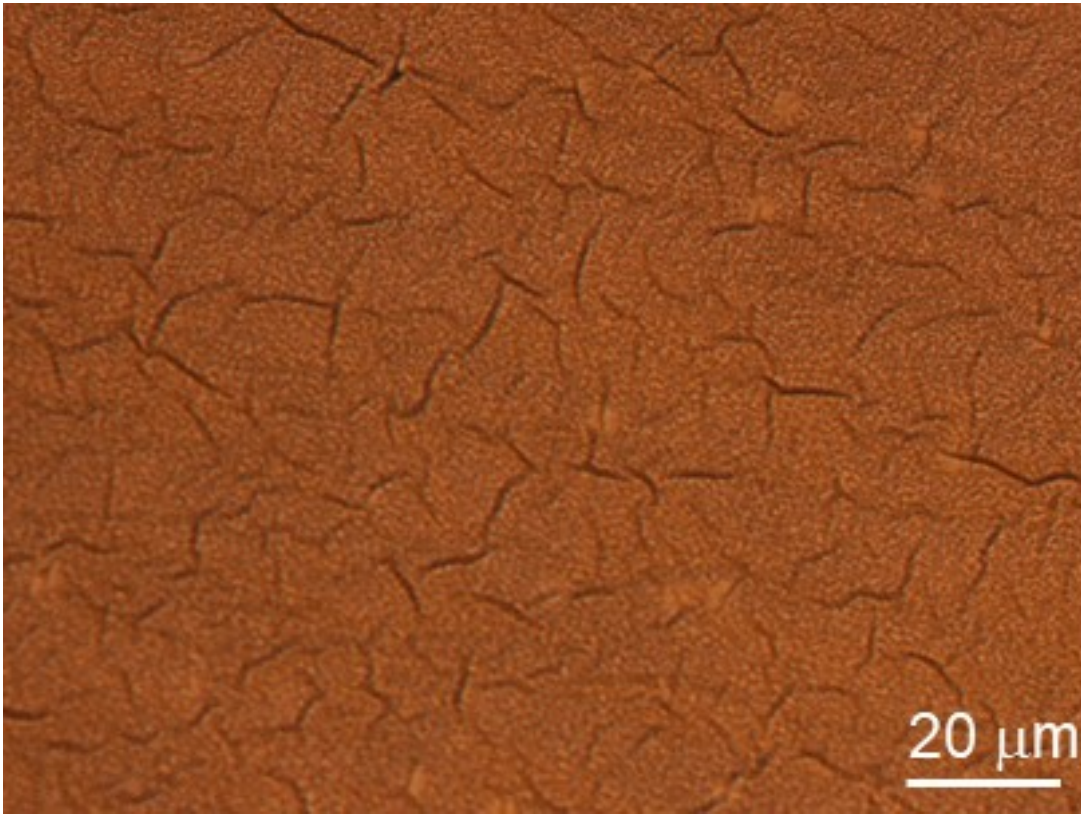

**Figure. S3.** Circularly-polarised differential interference contrast microscopy image of PPy/ONE-STEP.

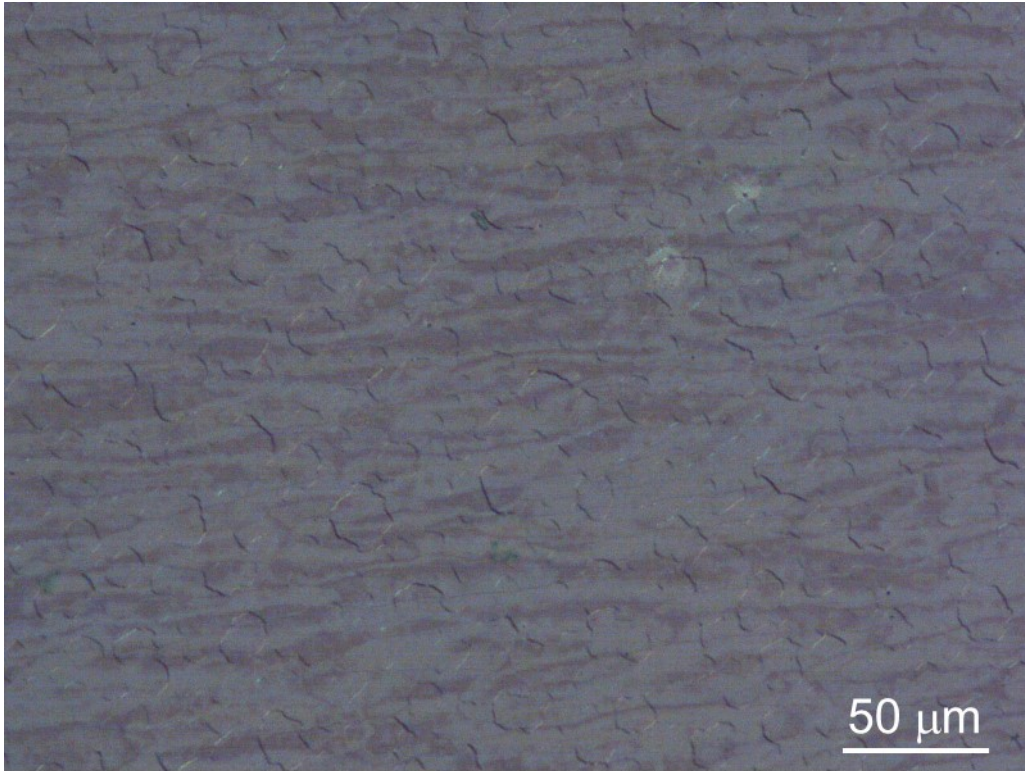

**Figure. S4.** POM image of PPy/TWO-STEP-6T.
